# Supplementary material for: Ag-SPR and semiconductor interface effect on a ternary CuO@Ag@Bi2S3 Z-scheme catalyst for enhanced removal of HIV drugs and (photo)catalytic activity
Source: Royal Society of Chemistry journal article supplement (doi:10.1039/d2nj02595g), 2022-01-01
Supplement: d2nj02595g1.pdf [file d2nj02595g1.pdf]

## SUPPORTING INFORMATION

**Ag-SPR and Semiconductor Interface Effect on Ternary CuO@Ag@Bi<sub>2</sub>S<sub>3</sub>  
Z-Scheme Catalyst for Enhanced Removal of HIV Drugs and  
(Photo)Catalytic Activity**

**Dasari Ayodhya\***

Department of Chemistry, University College of Science, Osmania University,  
Hyderabad-500007, Telangana State, India

Corresponding author E-mail:

\*E-mail: [ayodhyadasari@gmail.com](mailto:ayodhyadasari@gmail.com)

Tel: +91 9010877323

ORCID: <https://orcid.org/0000-0001-9831-9068>

## List of Supplementary Figures

**Scheme S1.** Schematic representation of  $\text{CuO@Ag@Bi}_2\text{S}_3$  ternary composite prepared by ultrasonication method

**Figure S1.** XPS spectra of the synthesized  $\text{CuO@Ag@Bi}_2\text{S}_3$  ternary composite: (a) Cu 2p, (b) Bi 4f, (c) Ag 3d, (d) C 1s, (e) S 2p, and (f) O 1s.

**Figure S2.** UV-vis diffuse reflectance spectra (a) and photoluminescence spectra (b) of the synthesized CuO,  $\text{Bi}_2\text{S}_3$ ,  $\text{Ag@CuO}$ ,  $\text{Ag@Bi}_2\text{S}_3$ ,  $\text{CuO@Bi}_2\text{S}_3$ , and  $\text{CuO@Ag@Bi}_2\text{S}_3$  ternary composite.

**Figure S3.** The UV-vis absorption profiles of the removal efficiencies of (a) STV and (b) ZDV HIV drugs using  $\text{CuO@Ag@Bi}_2\text{S}_3$  ternary composite

**Figure S4.** The degradation efficiencies of (a) MB, (b) RhB, (c) MB at 664 nm in MB + RhB, and (d) RhB at 553 nm in MB + RhB mixed dye using CuO,  $\text{Bi}_2\text{S}_3$ ,  $\text{Ag@CuO}$ ,  $\text{Ag@Bi}_2\text{S}_3$ ,  $\text{CuO@Bi}_2\text{S}_3$ , and  $\text{CuO@Ag@Bi}_2\text{S}_3$  ternary composite under visible light irradiation.

**Figure S5.** The kinetics of (a) MB, (b) RhB, (c) MB at 664 nm in MB + RhB, (d) RhB at 553 nm in MB + RhB mixed dye, and (e) MCP degradation using CuO,  $\text{Bi}_2\text{S}_3$ ,  $\text{Ag@CuO}$ ,  $\text{Ag@Bi}_2\text{S}_3$ ,  $\text{CuO@Bi}_2\text{S}_3$ , and  $\text{CuO@Ag@Bi}_2\text{S}_3$  ternary composite under visible light irradiation.

**Figure S6.** Reuse experiments of the synthesized  $\text{CuO@Ag@Bi}_2\text{S}_3$  ternary composite in the photocatalytic degradation of (a) MB and (b) RhB dyes under visible light irradiation.

**Figure S7.** Trapping experiments of active species during the photocatalytic degradation of (a) MB, (b) RhB, (c) MB at 664 nm in MB + RhB, and (d) RhB at 553 nm in MB + RhB mixed dye using CuO@Ag@Bi<sub>2</sub>S<sub>3</sub> ternary composite under visible light irradiation.

**Figure S8.** Trapping experiment of active species during degradation of MCP over CuO@Ag@Bi<sub>2</sub>S<sub>3</sub> ternary composite catalyst under visible light irradiation.

**Figure S9.** The kinetics of 4-NP reduction using CuO, Bi<sub>2</sub>S<sub>3</sub>, Ag@CuO, Ag@Bi<sub>2</sub>S<sub>3</sub>, CuO@Bi<sub>2</sub>S<sub>3</sub>, and CuO@Ag@Bi<sub>2</sub>S<sub>3</sub> ternary composite.

**Scheme S2.** Speculated reaction mechanism of the photocatalytic degradation of organic pollutants (dyes, pesticides, and antibiotics) catalyzed by CuO@Ag@Bi<sub>2</sub>S<sub>3</sub> ternary composite.

## Supplementary Figures

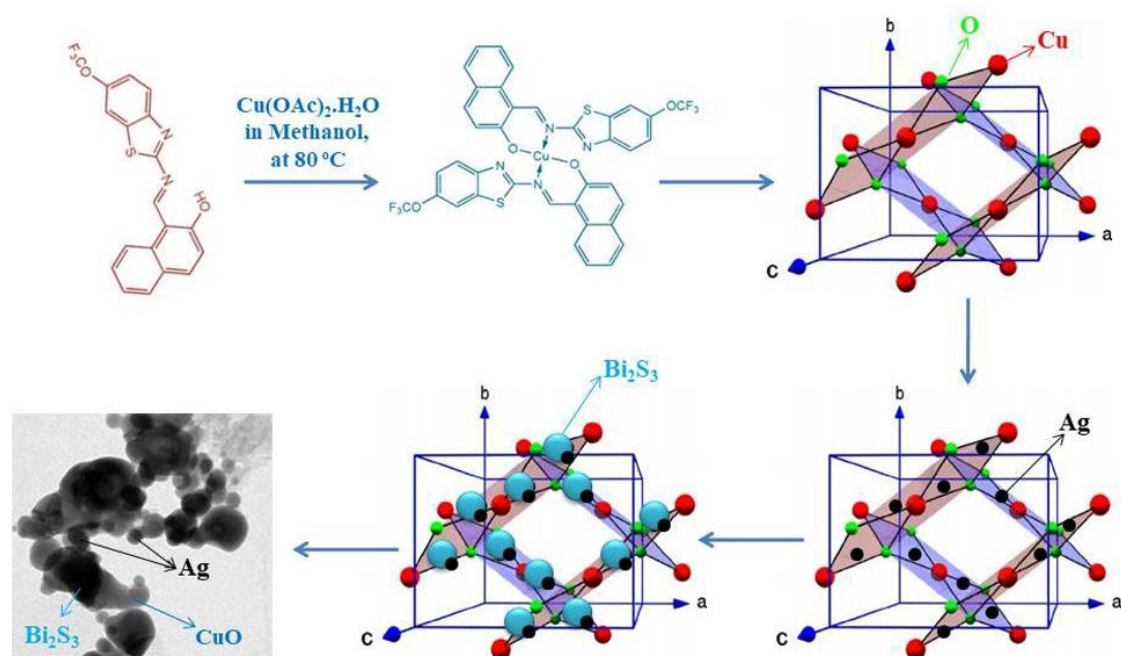

Scheme S1

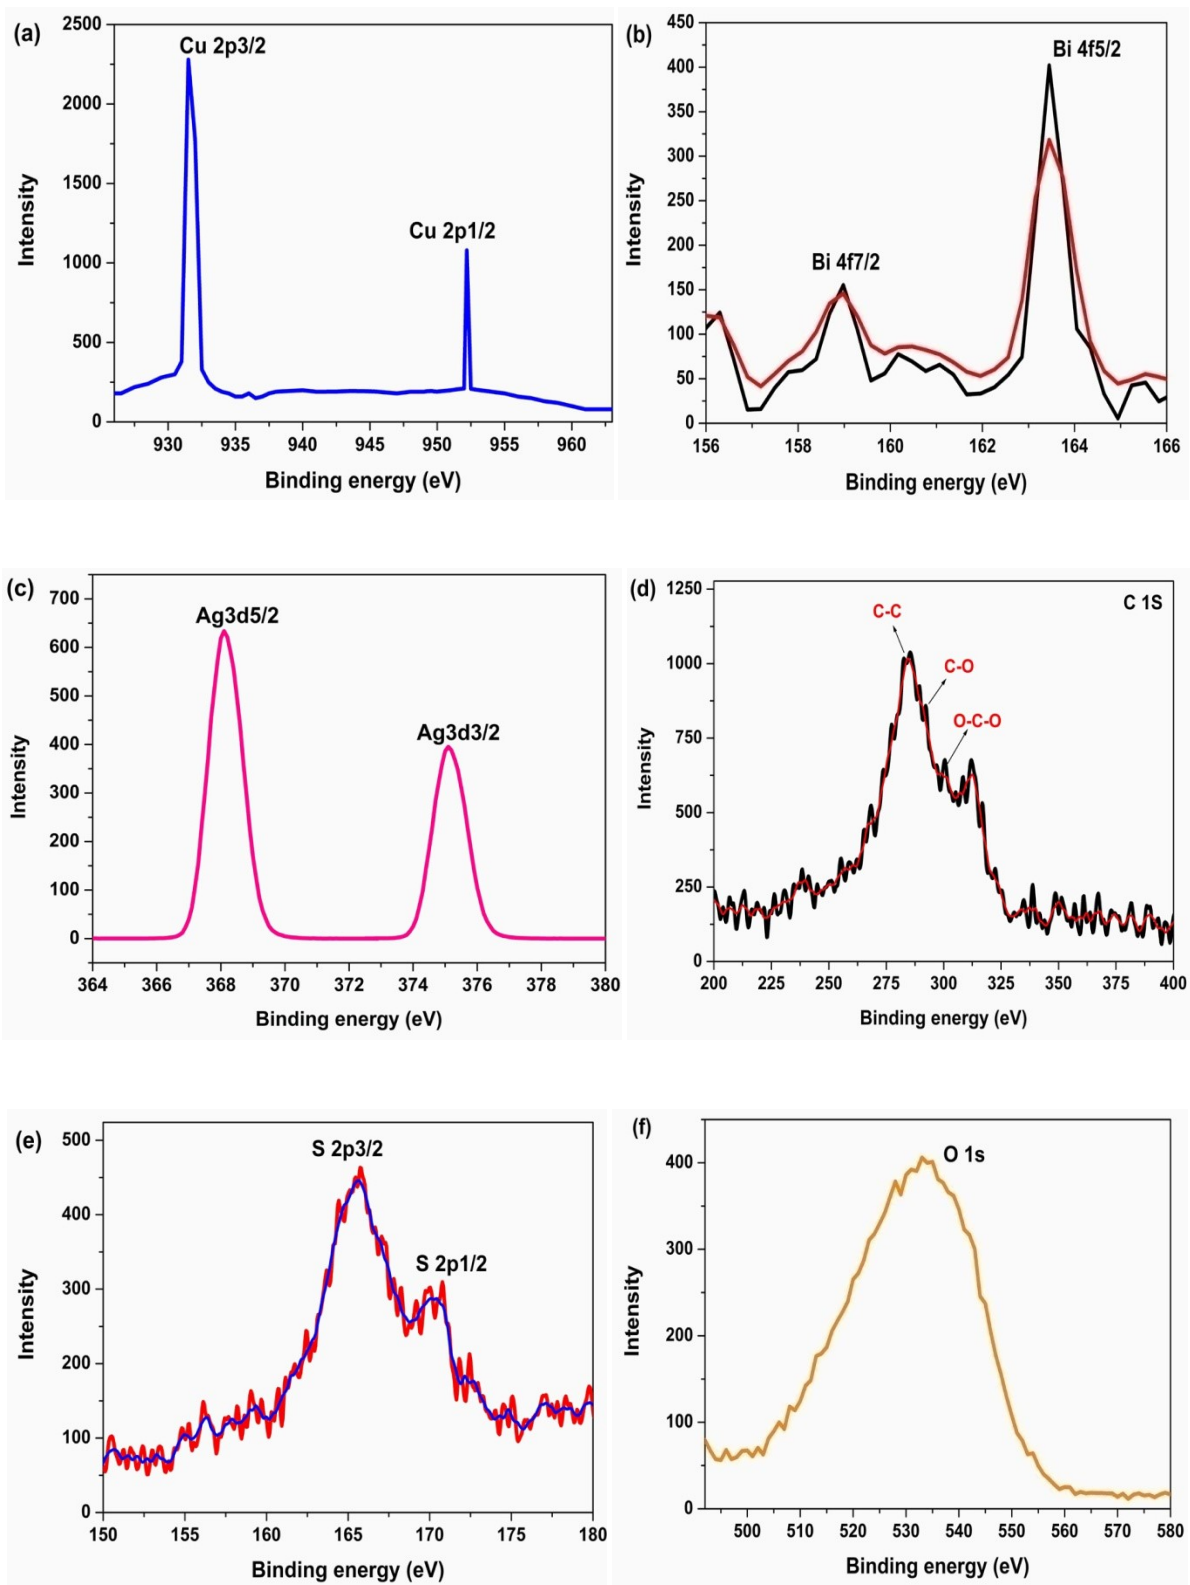

Figure S1

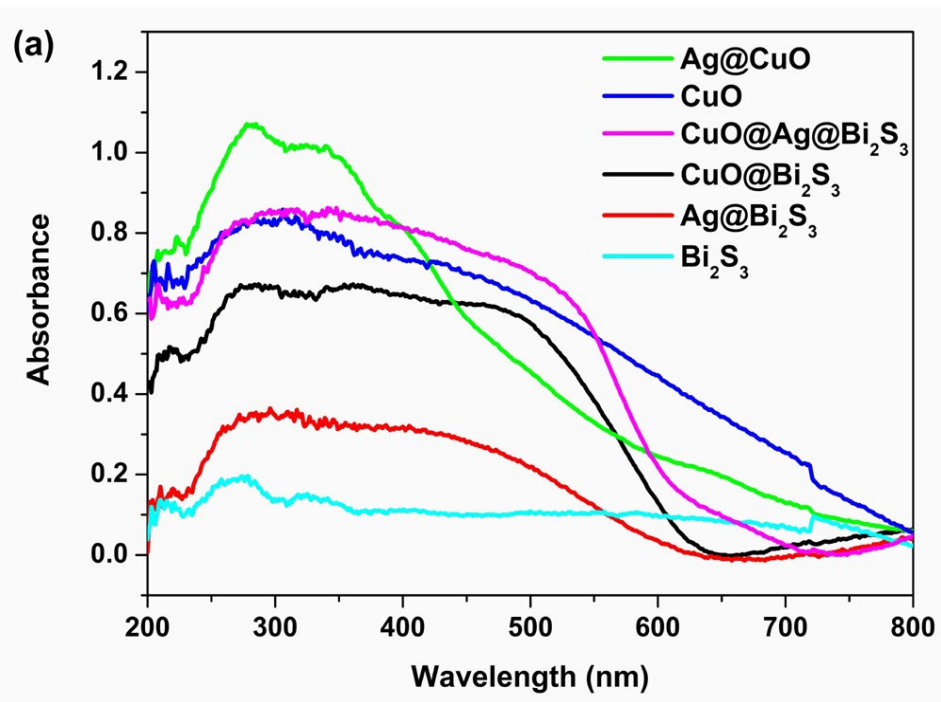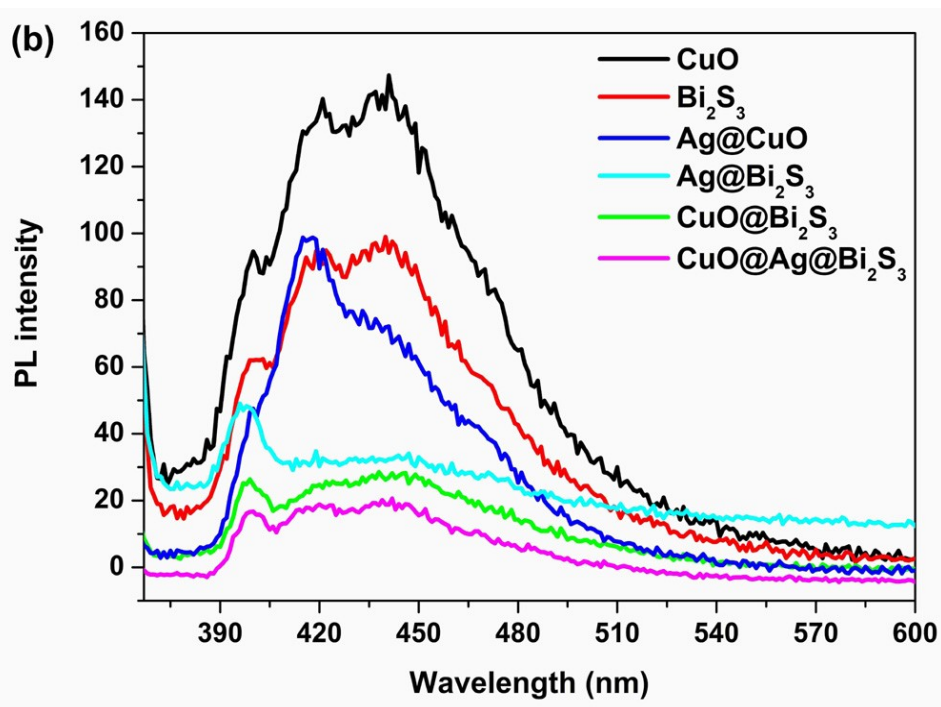

Figure S2

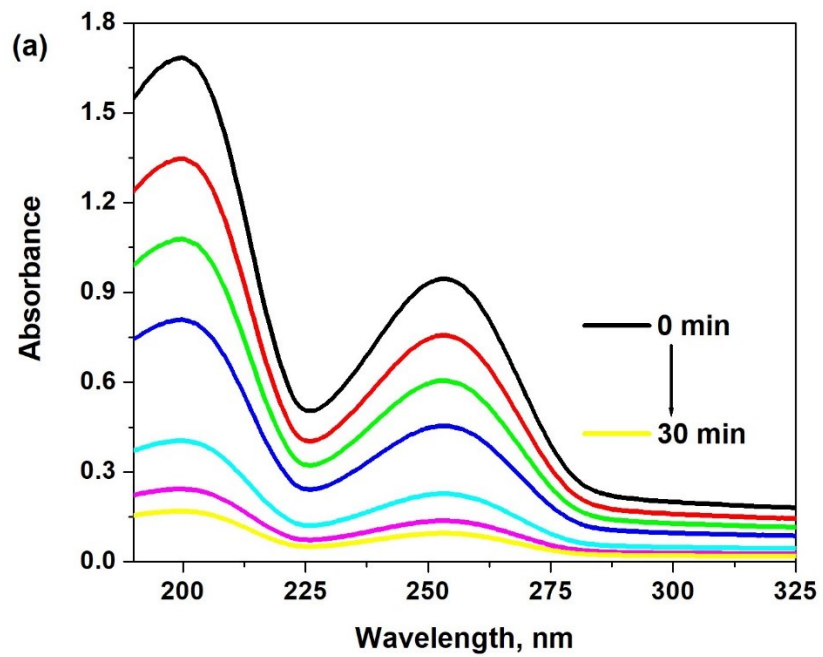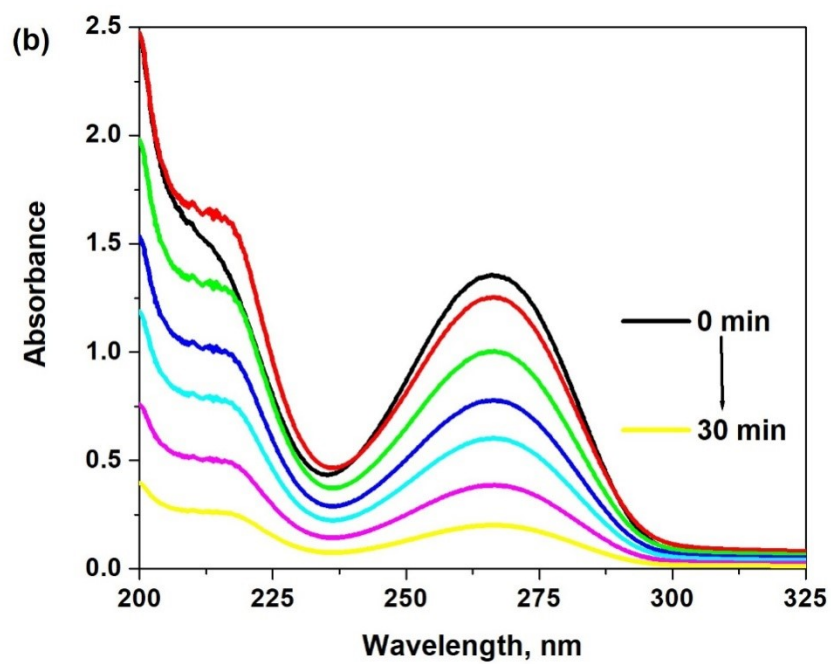

Figure S3

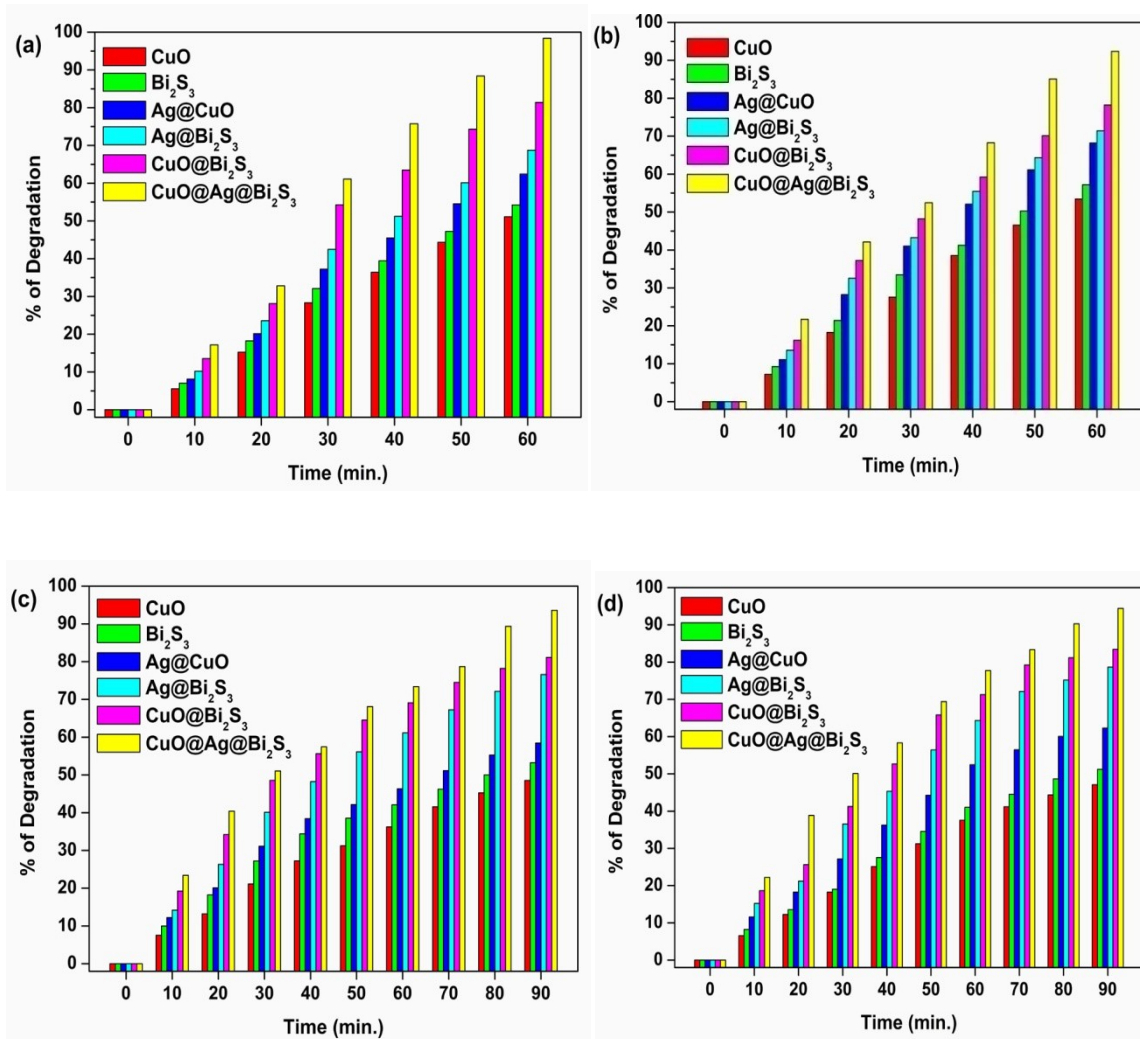

Figure S4



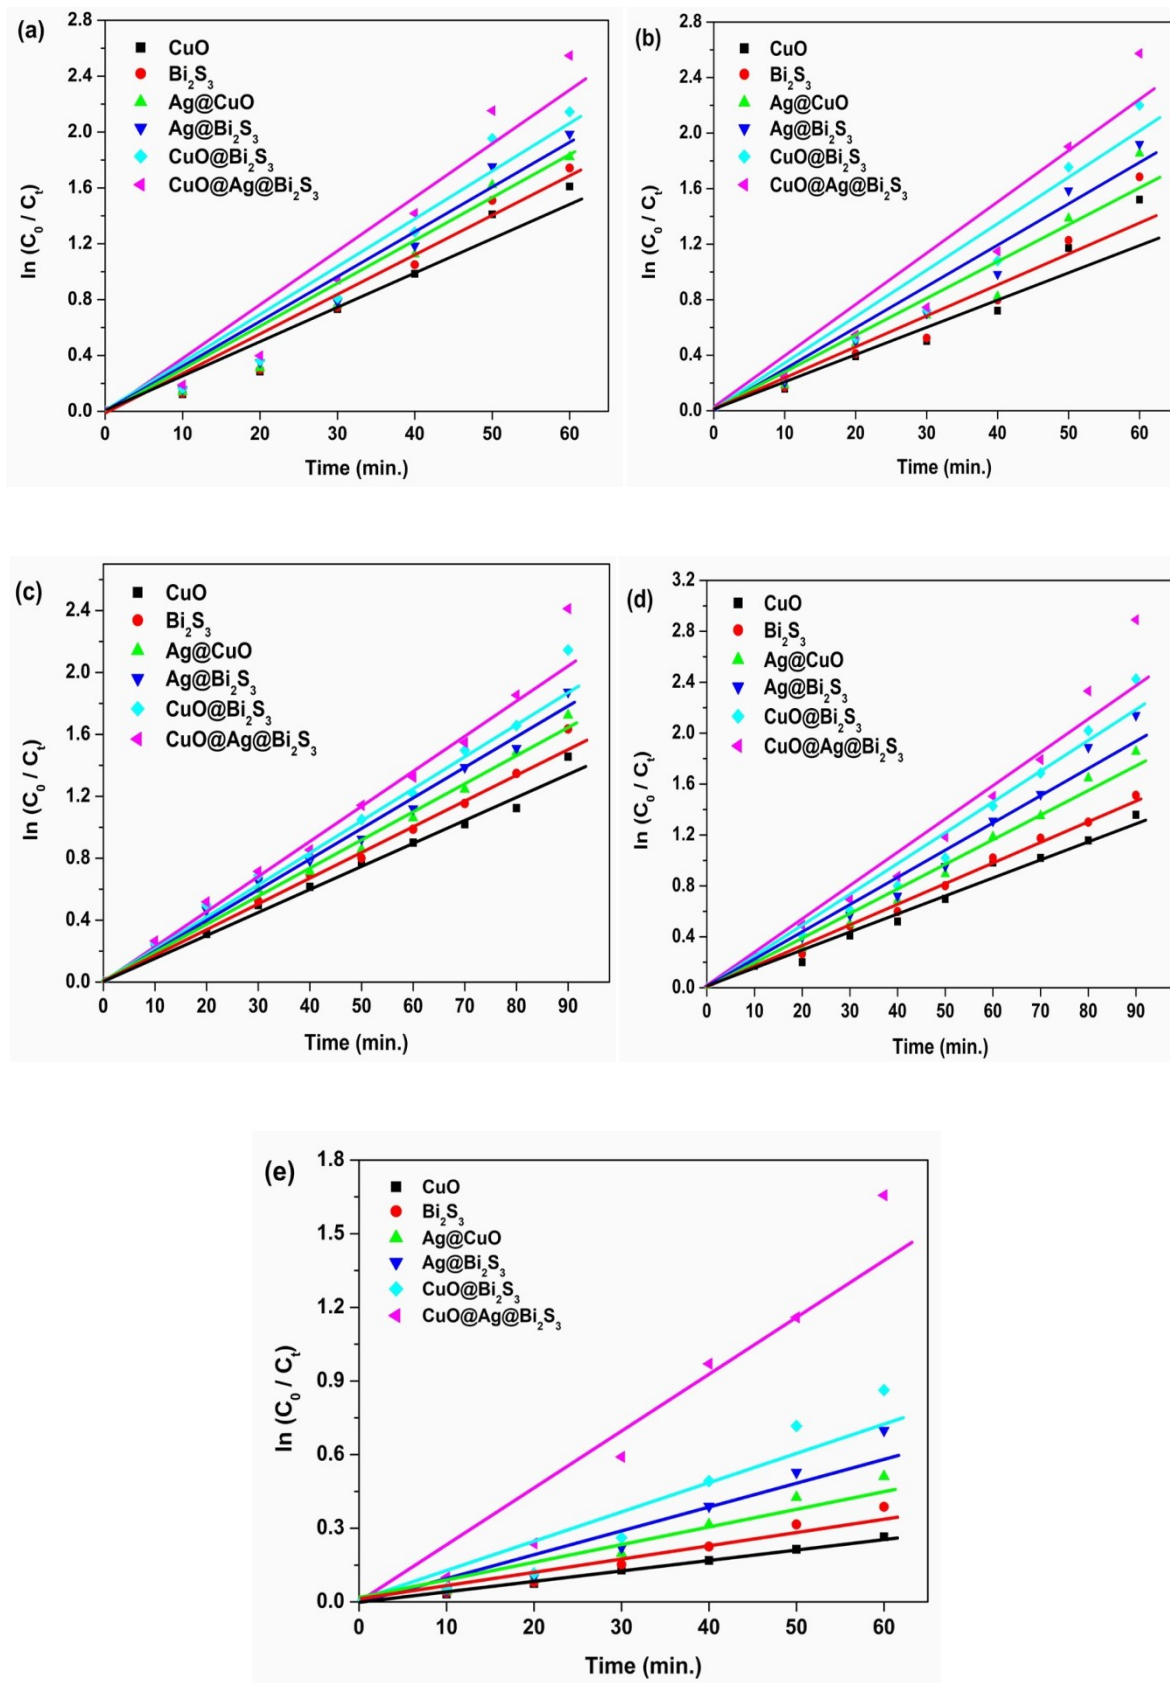

Figure S5

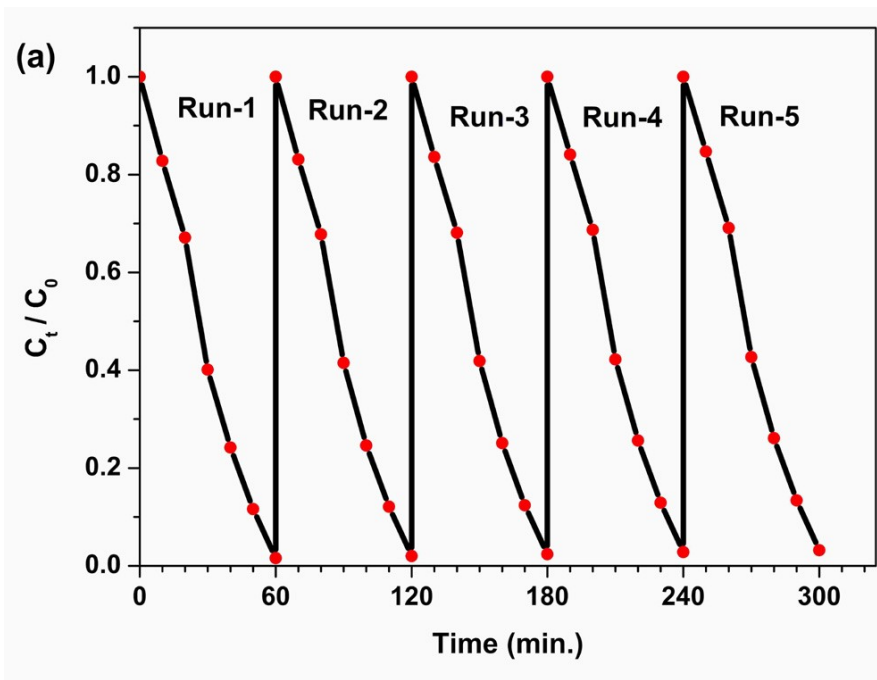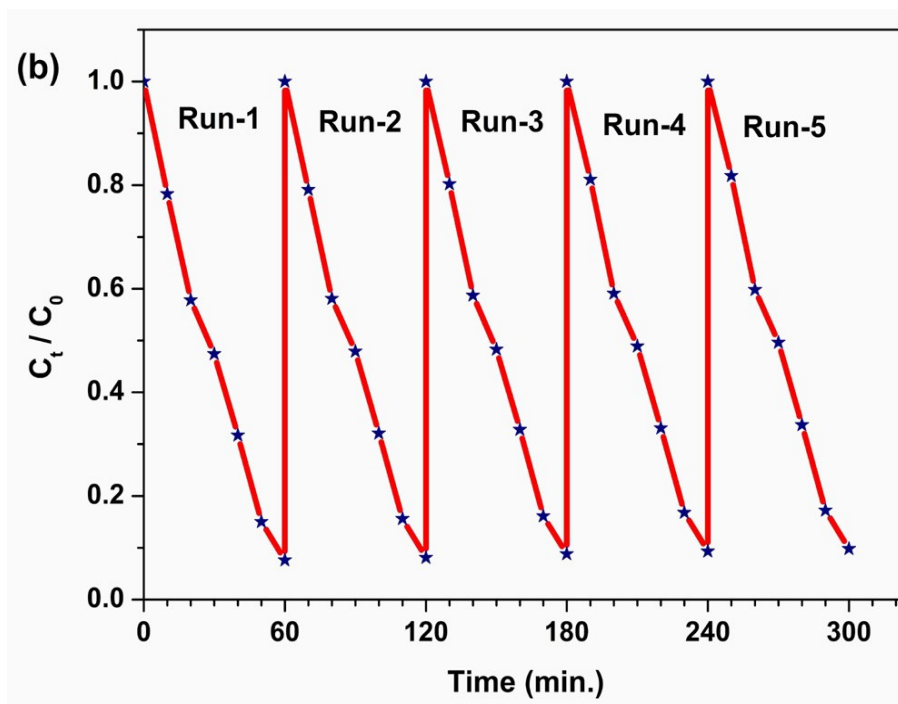

Figure S6

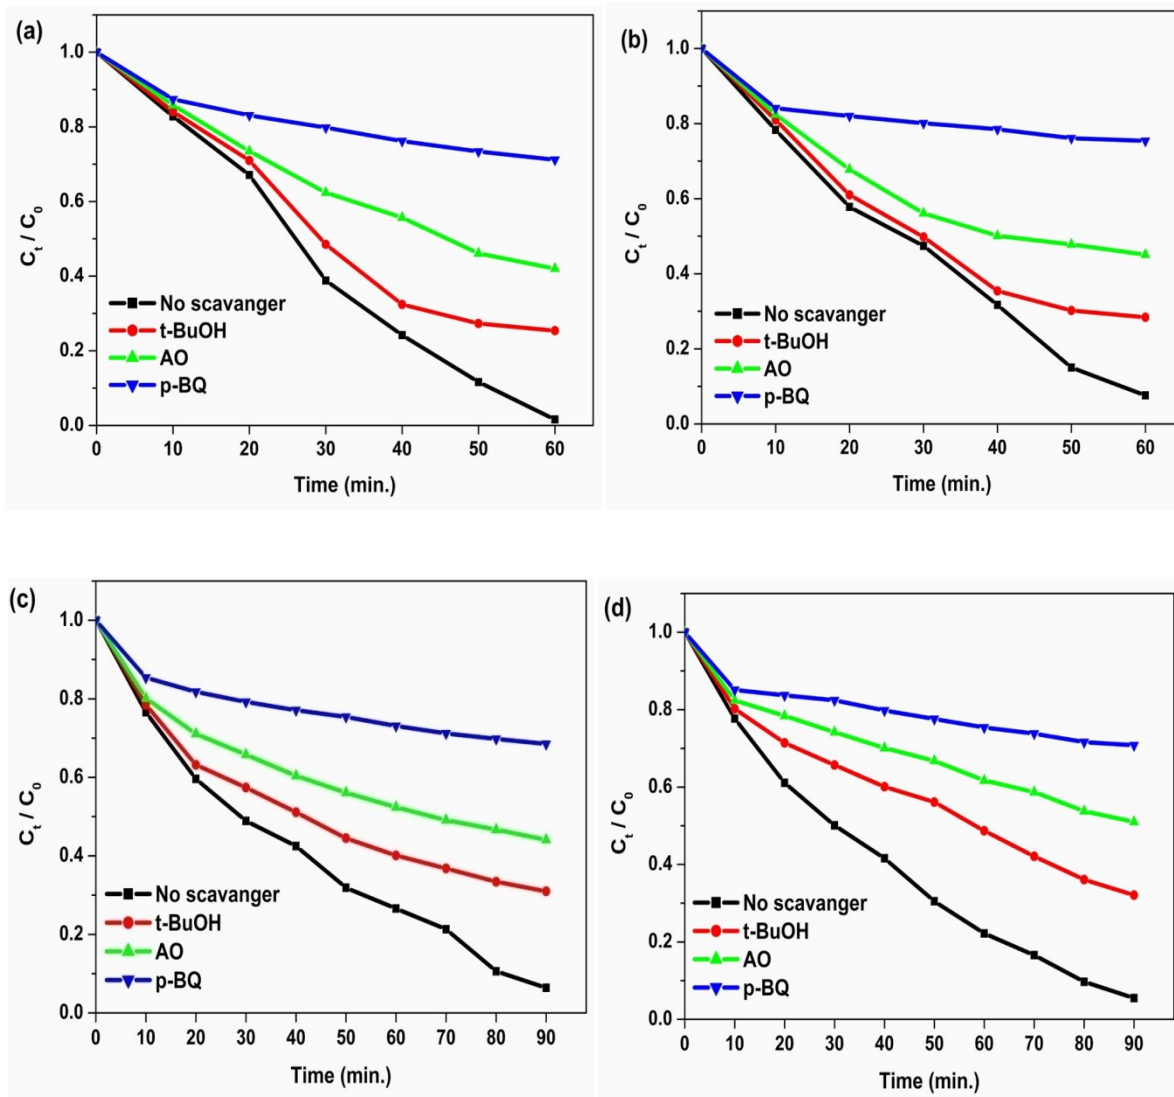

Figure S7

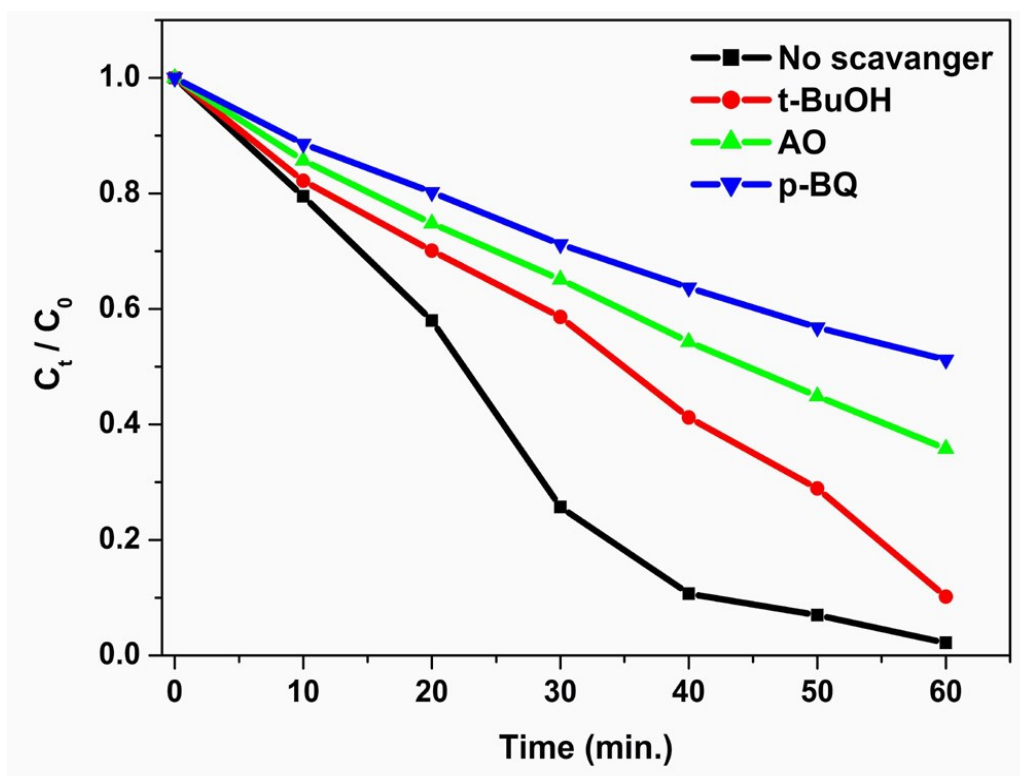

Figure S8

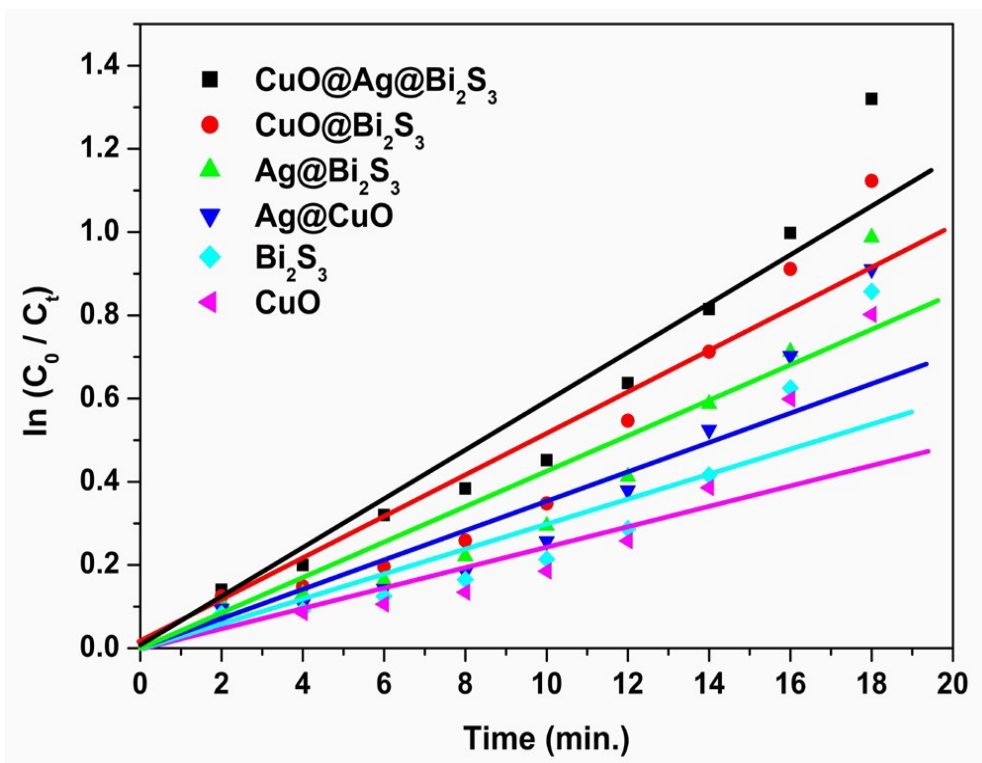

Figure S9

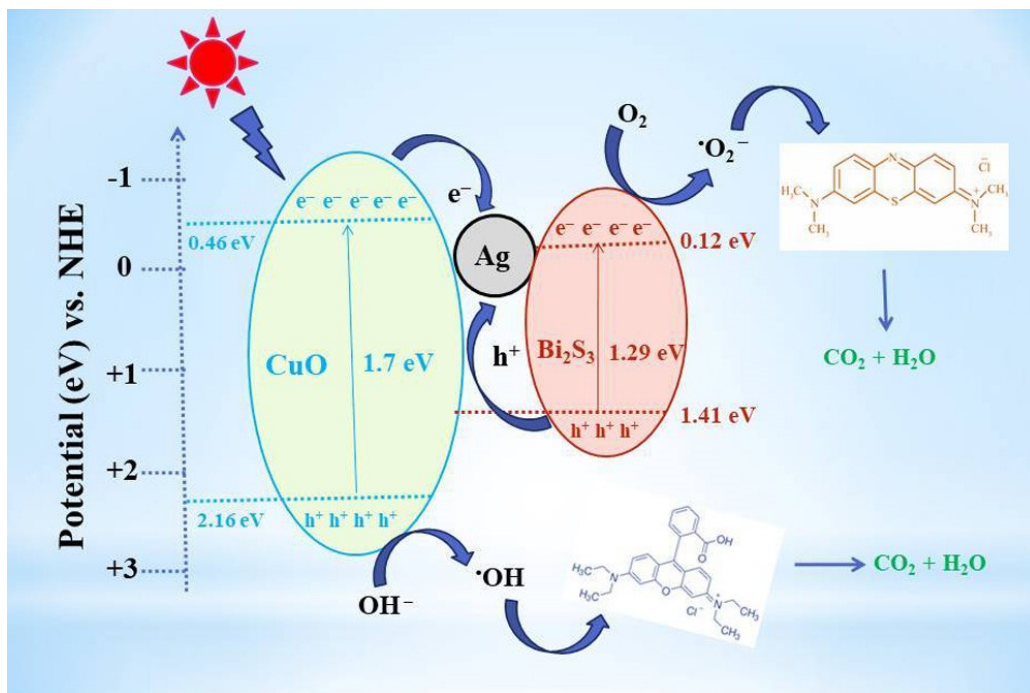

Scheme S2
